# Supplementary material for: Scalable neutral H2O2 electrosynthesis by platinum diphosphide nanocrystals by regulating oxygen reduction reaction pathways
Source: PubMed Central journal article supplement (PMC7411044; doi:10.1038/s41467-020-17584-9), 2020-08-06
Supplement: 41467_2020_17584_MOESM1_ESM.pdf [file 41467_2020_17584_MOESM1_ESM.pdf]

**Supplementary information for “Scalable neutral H<sub>2</sub>O<sub>2</sub> electrosynthesis by platinum diphosphide nanocrystals by regulating oxygen reduction reaction pathways” by Hui Li et al.**

## Supplementary Figure 1

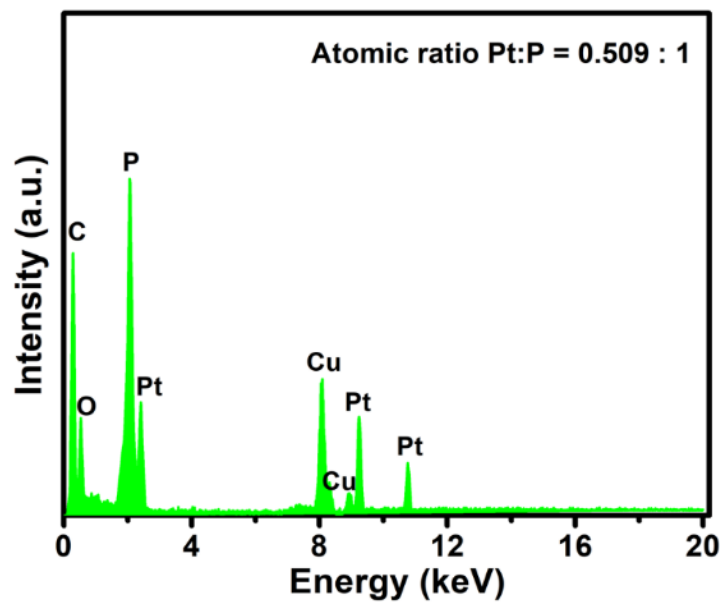

**Supplementary Figure 1.** Energy-dispersive X-ray spectroscopy (EDS) of PtP<sub>2</sub> NCs. Sample on TEM copper grid.

## Supplementary Figure 2

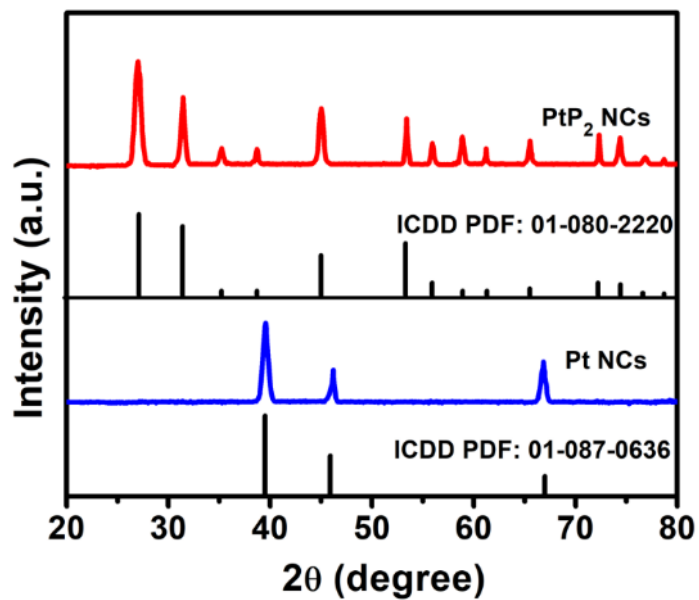

Supplementary Figure 2. X-ray diffraction (XRD) patterns of PtP<sub>2</sub> and Pt NCs.

### Supplementary Figure 3

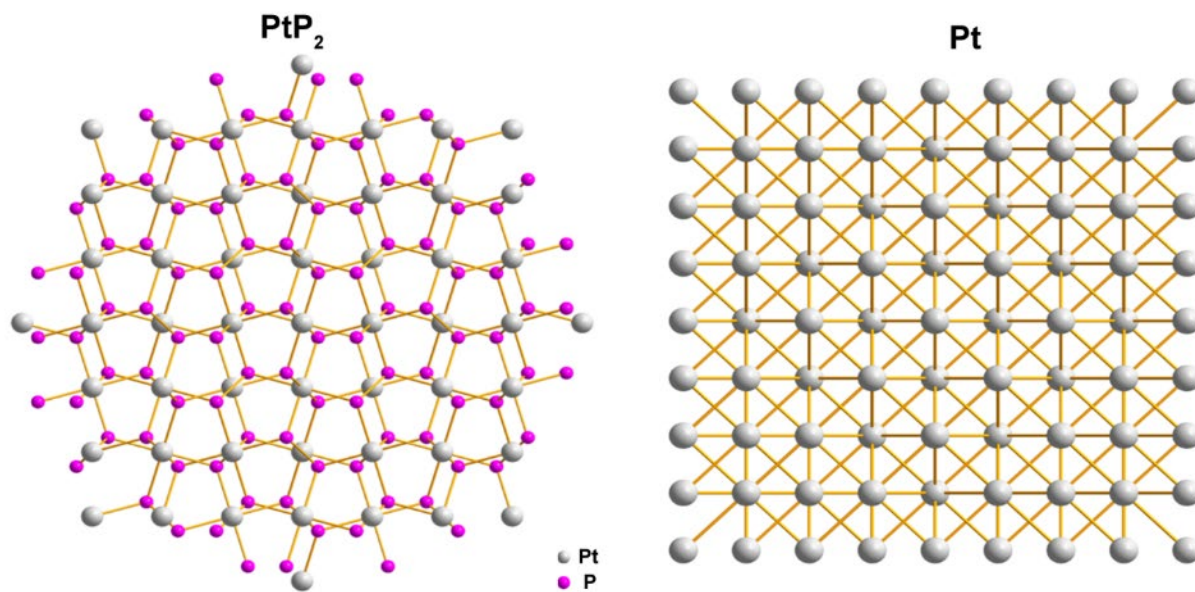

**Supplementary Figure 3.** Crystal structures of cubic  $\text{PtP}_2$  and Pt NCs.

## Supplementary Figure 4

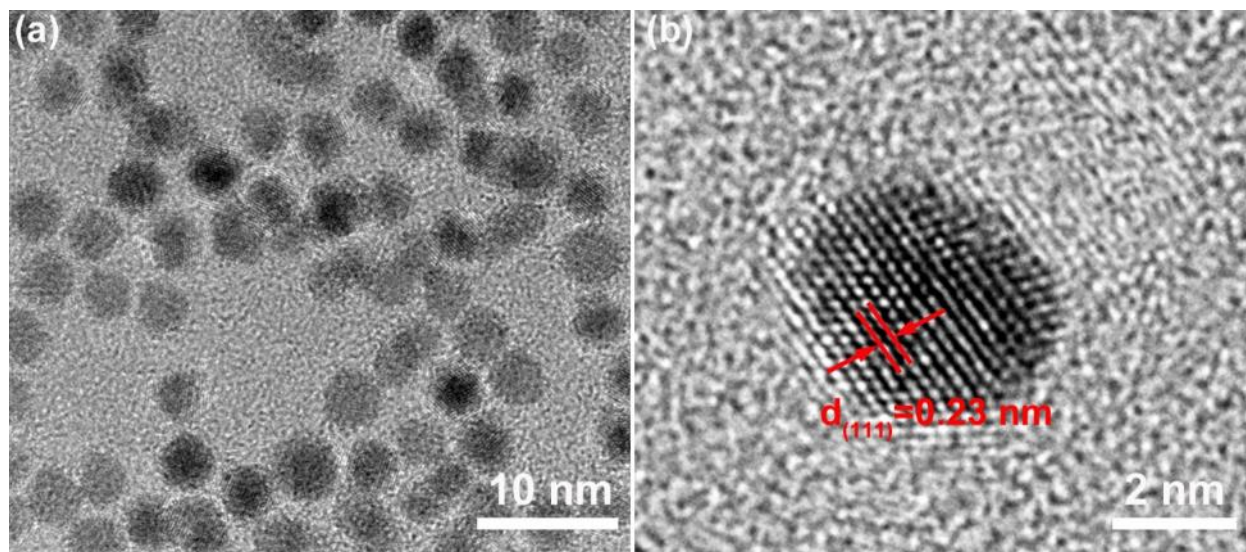

**Supplementary Figure 4.** Electron microscopy characterization of Pt NCs. (a) TEM and (b) HRTEM images of Pt NCs for comparison. The average size of Pt NCs is  $4 \pm 0.3 \text{ nm}$ .

## Supplementary Figure 5

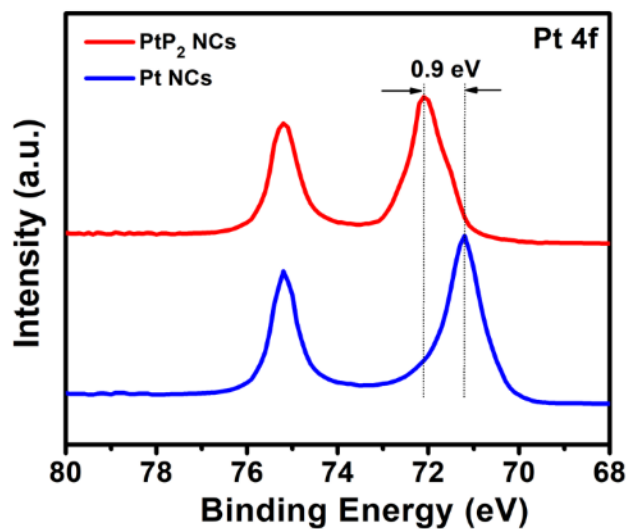

**Supplementary Figure 5.** Pt 4f core level XPS spectra of PtP<sub>2</sub> and Pt NCs. A positive shift of 0.9 eV for binding energy is observed on PtP<sub>2</sub> NCs compared to the Pt NCs.

## Supplementary Figure 6

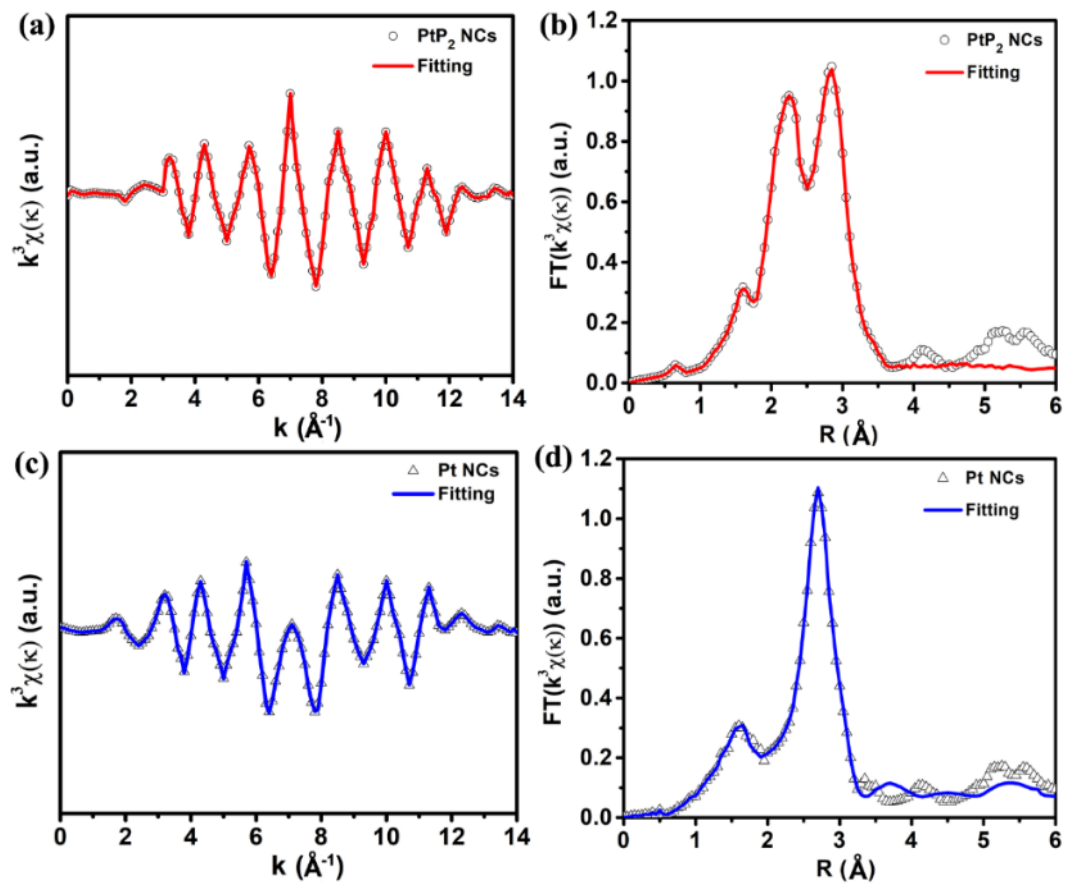

**Supplementary Figure 6.** R space and inverse FT-EXAFS fitting results of Pt L<sub>3</sub>-edge. (a) and (b) PtP<sub>2</sub> NCs, and (c) and (d) Pt NCs. The FT range: 2.0-14.0  $\text{\AA}^{-1}$ ; fitting range: 0.5-3.0  $\text{\AA}$ .

## Supplementary Figure 7

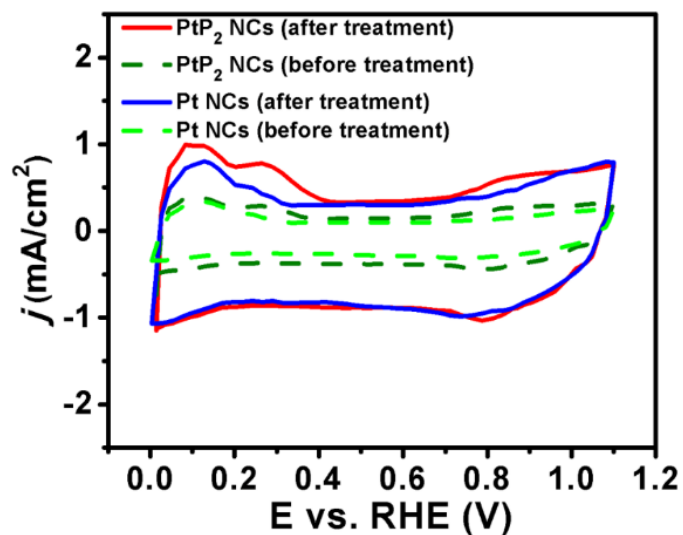

**Supplementary Figure 7.** Cyclic voltammetry for PtP<sub>2</sub> and Pt NCs before and after acetic acid treatment. Samples in N<sub>2</sub>-saturated 0.1 M HClO<sub>4</sub>. Both the electrochemical activity of PtP<sub>2</sub> NCs and Pt NCs is increased after acetic acid post-treatment. This is consistent with previous work that the mild acetic acid treatment is capable of removing partial surface organic ligand of oleyamine and maintaining the size and surface properties of nanoparticles<sup>1,2</sup>.



## Supplementary Figure 8

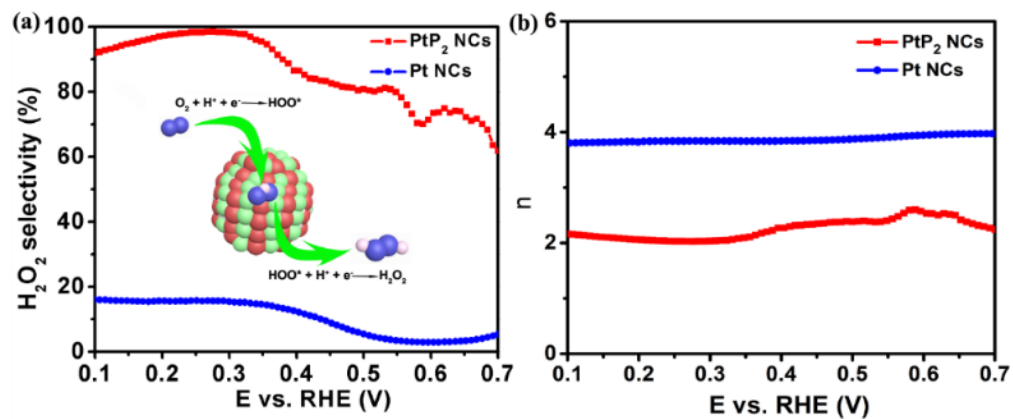

**Supplementary Figure 8.** Selectivity comparison of PtP<sub>2</sub> and Pt NCs. (a) The percentage of hydrogen peroxide and (b) electron transfer number of PtP<sub>2</sub> and Pt NCs within the scan range of 0.1-0.7 V vs. RHE. The electrolyte is 0.1 M HClO<sub>4</sub> (pH = 1).

## Supplementary Figure 9

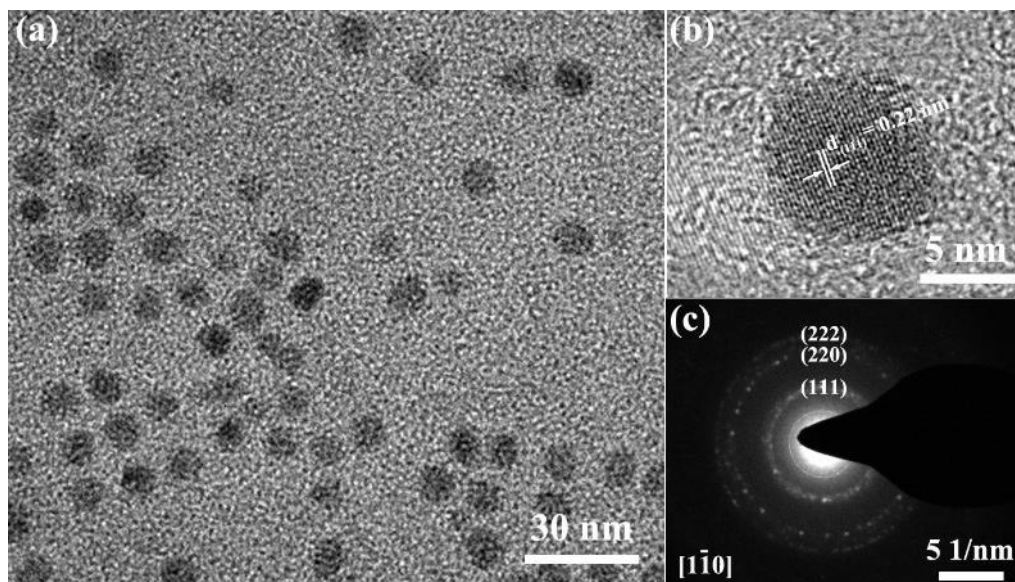

**Supplementary Figure 9.** Electron microscopy characterization of Pt-Hg NCs. (a) TEM image, (b) HRTEM image, and (c) corresponding selected-area electron diffraction (SAED) image of Pt-Hg NCs.

## Supplementary Figure 10

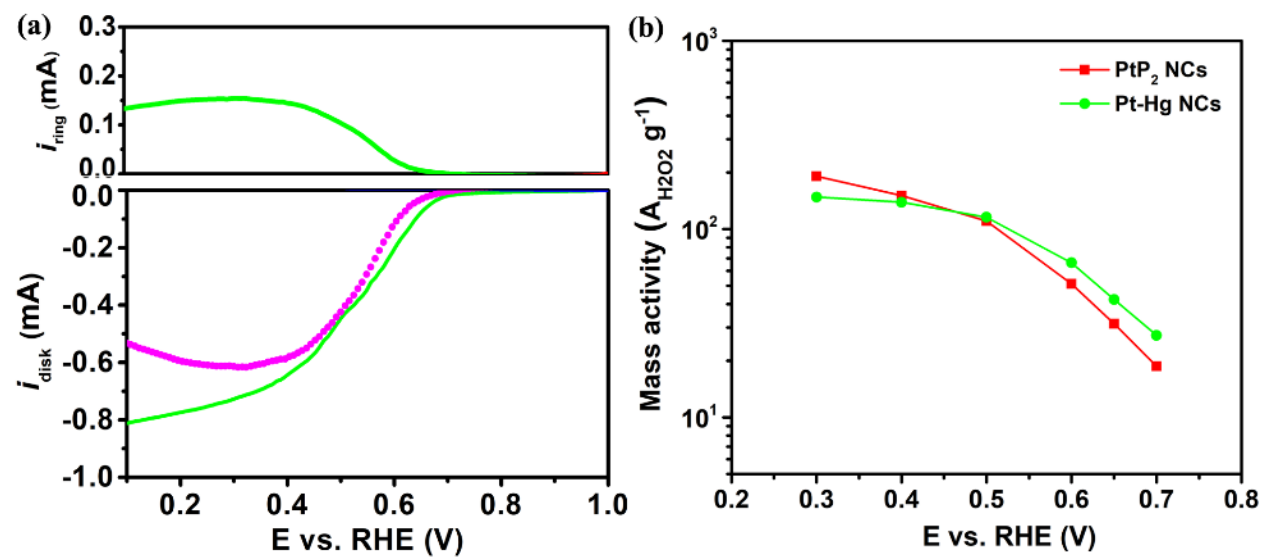

**Supplementary Figure 10.** Activity measurements of Pt-Hg NCs. (a) RRDE voltammograms of Pt-Hg NCs measured at 1600 rpm in O<sub>2</sub>-saturated 0.1 M HClO<sub>4</sub> electrolyte. (b) Mass activity of PtP<sub>2</sub> NCs and Pt-Hg NCs for H<sub>2</sub>O<sub>2</sub> production in the potential range of 0.3-0.7 V vs. RHE.

## Supplementary Figure 11

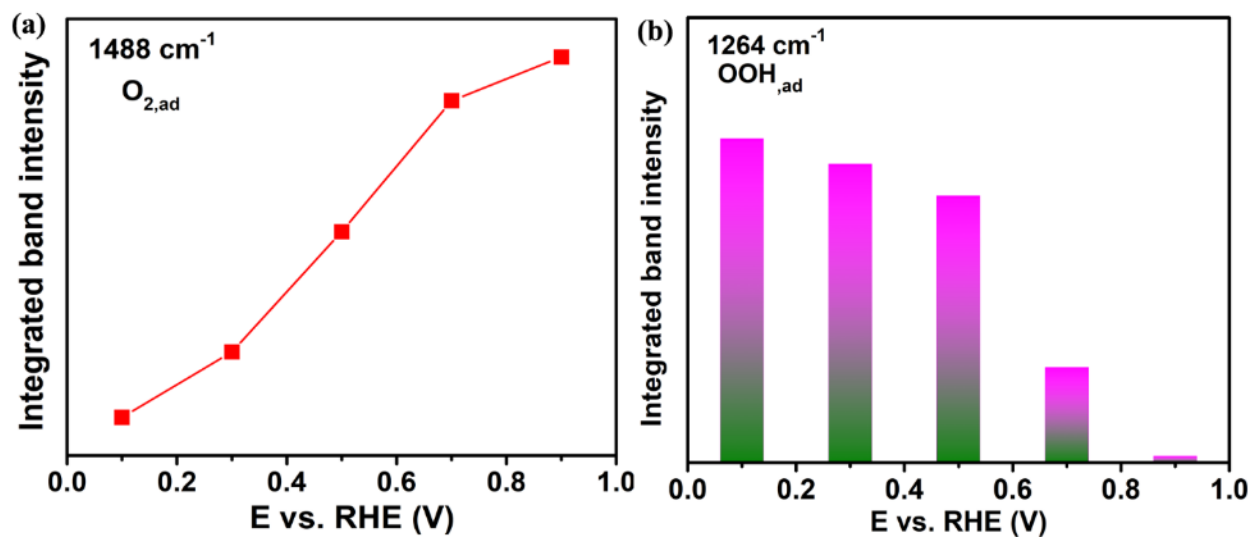

**Supplementary Figure 11.** In situ ATR-IR during ORR. The integrated intensity of the (a) 1488 cm<sup>-1</sup> and (b) 1264 cm<sup>-1</sup> bands at various ORR potentials in O<sub>2</sub>-saturated solutions of 0.1 M HClO<sub>4</sub> during in situ ATR-IR experiments.

## Supplementary Figure 12

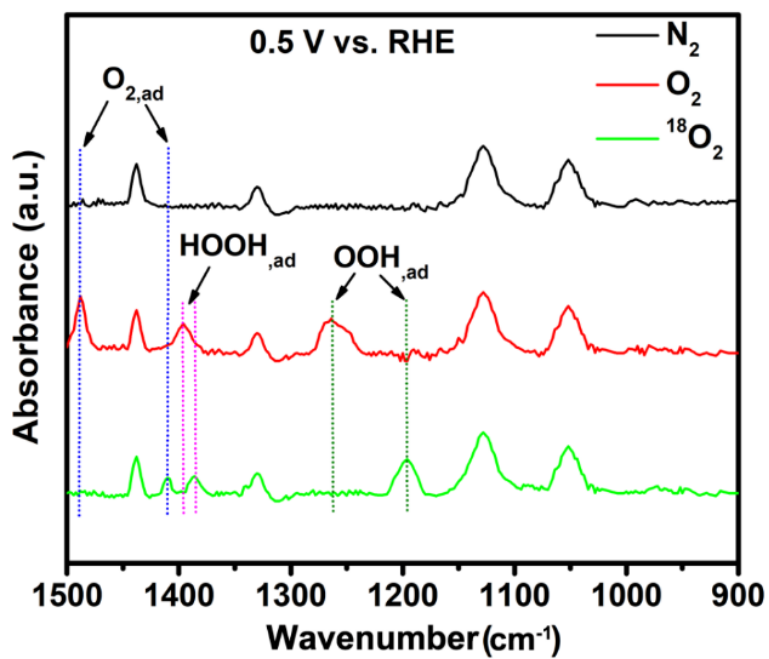

**Supplementary Figure 12.** IR spectra for supported PtP<sub>2</sub> catalyst in N<sub>2</sub>, O<sub>2</sub>, and <sup>18</sup>O<sub>2</sub>-saturated 0.1 M HClO<sub>4</sub> solution at 0.5 V vs. RHE.

### Supplementary Figure 13

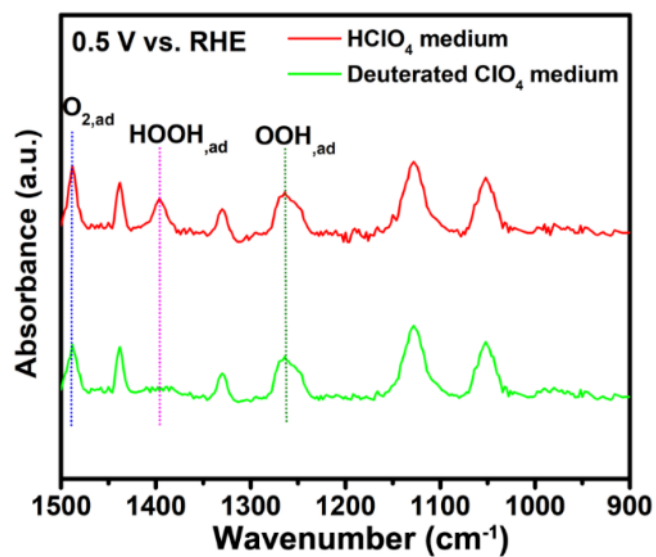

**Supplementary Figure 13.** The IR spectra for supported  $\text{PtP}_2$  catalyst in  $\text{O}_2$ -saturated 0.1 M  $\text{HClO}_4$  and deuterated  $\text{ClO}_4^-$  solution at 0.5 V vs. RHE. Anhydrous  $\text{NaClO}_4$  was used in  $\text{D}_2\text{O}$  solution saturated with  $\text{O}_2$  gas at  $\text{pD} = 1$

## Supplementary Figure 14

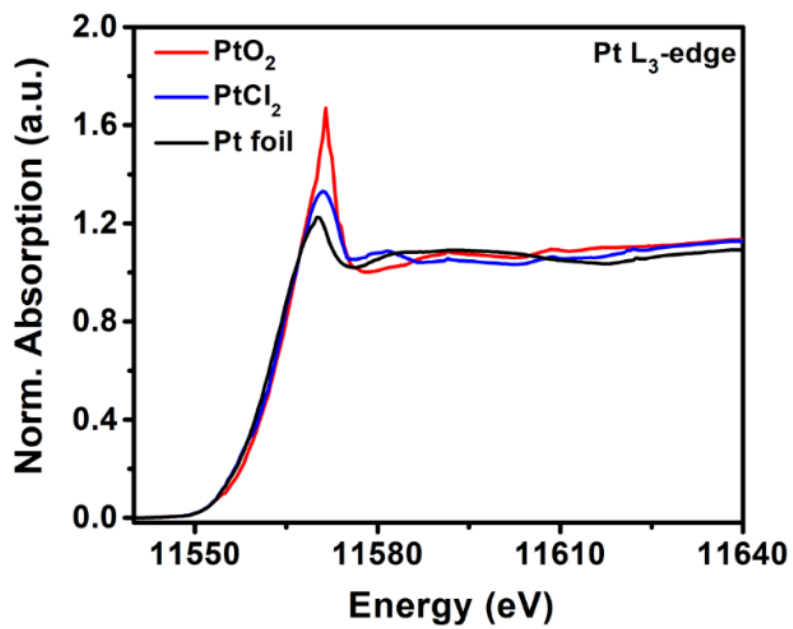

Supplementary Figure 14. Pt L<sub>3</sub>-edge XANES spectra of reference samples of PtO<sub>2</sub>, PtCl<sub>2</sub>, and Pt foil.

## Supplementary Figure 15

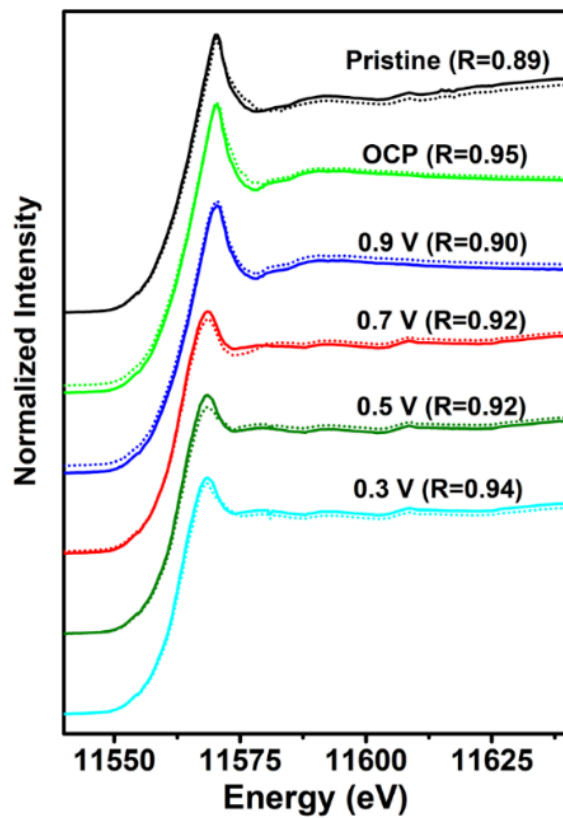

**Supplementary Figure 15.** In-situ Pt L<sub>3</sub>-edge of PtP<sub>2</sub> NCs. Linear combination of PtO<sub>2</sub>, PtCl<sub>2</sub>, and Pt foil spectra (solid line) as compared to the raw in-situ Pt L<sub>3</sub>-edge of PtP<sub>2</sub> NCs at OCP (green), 0.9 V (blue), 0.7 V (red), 0.5 V (olive), and 0.3 V (cyan) for 30 min.



## Supplementary Figure 16

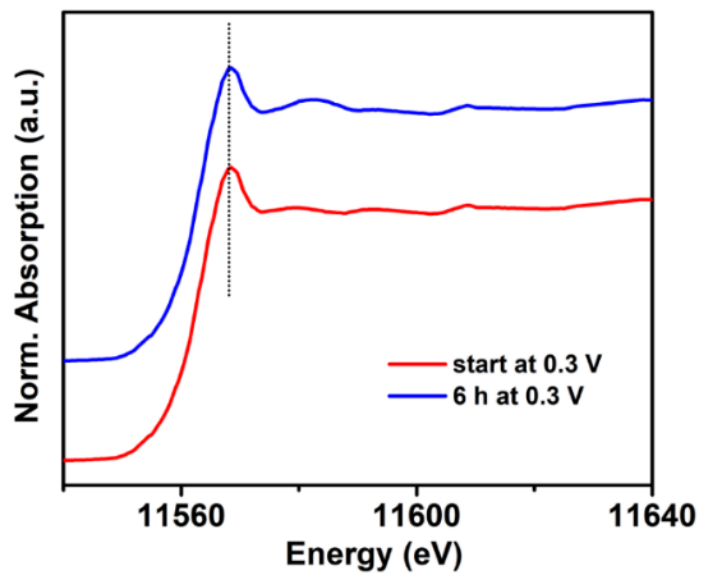

**Supplementary Figure 16.** Pt L<sub>3</sub>-edge XANES spectra of PtP<sub>2</sub> NCs under a constant applied potential of 0.3 V vs. RHE. Initial spectrum and spectrum after 6 h are shown.

Supplementary Figure 17

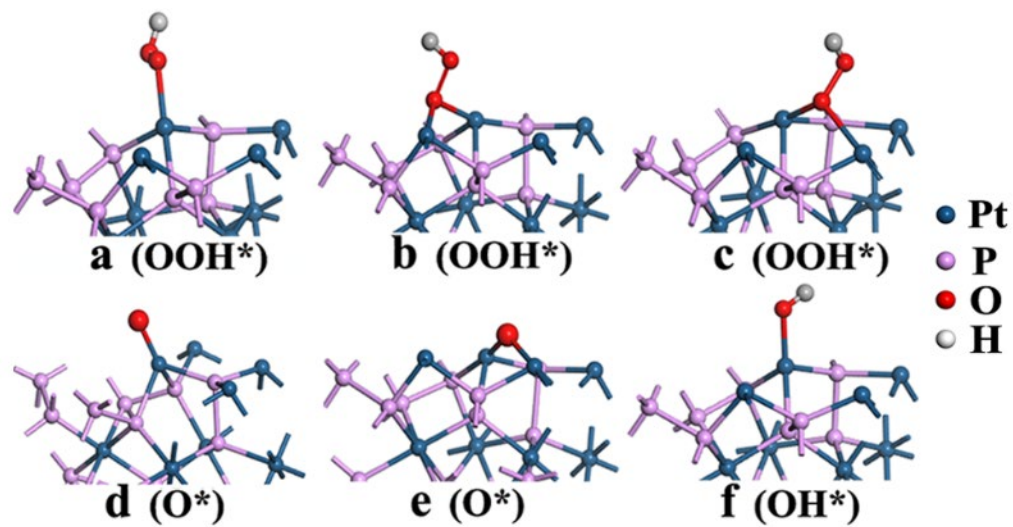

Supplementary Figure 17. Adsorption structures for all possible active sites on PtP<sub>2</sub> (111).

## Supplementary Figure 18

### End-on Configuration

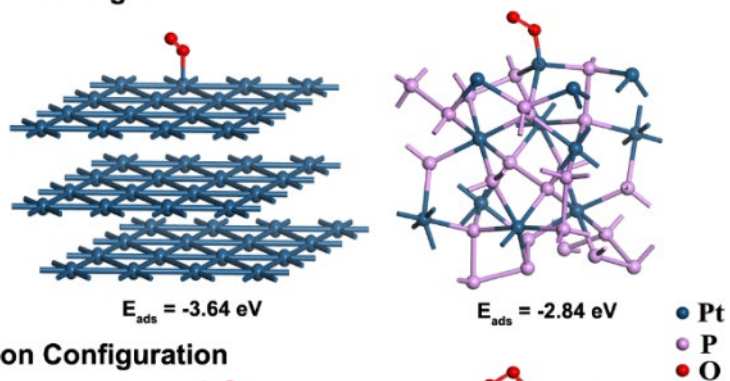

### Side-on Configuration

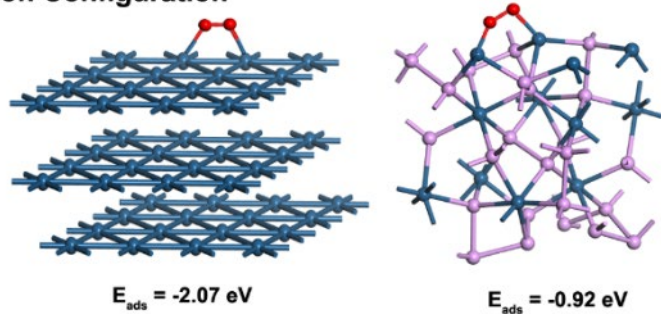

**Supplementary Figure 18.**  $O_2$  adsorbed on PtP<sub>2</sub> (111) and Pt (111) in the end-on and side-on configuration.

## Supplementary Figure 19

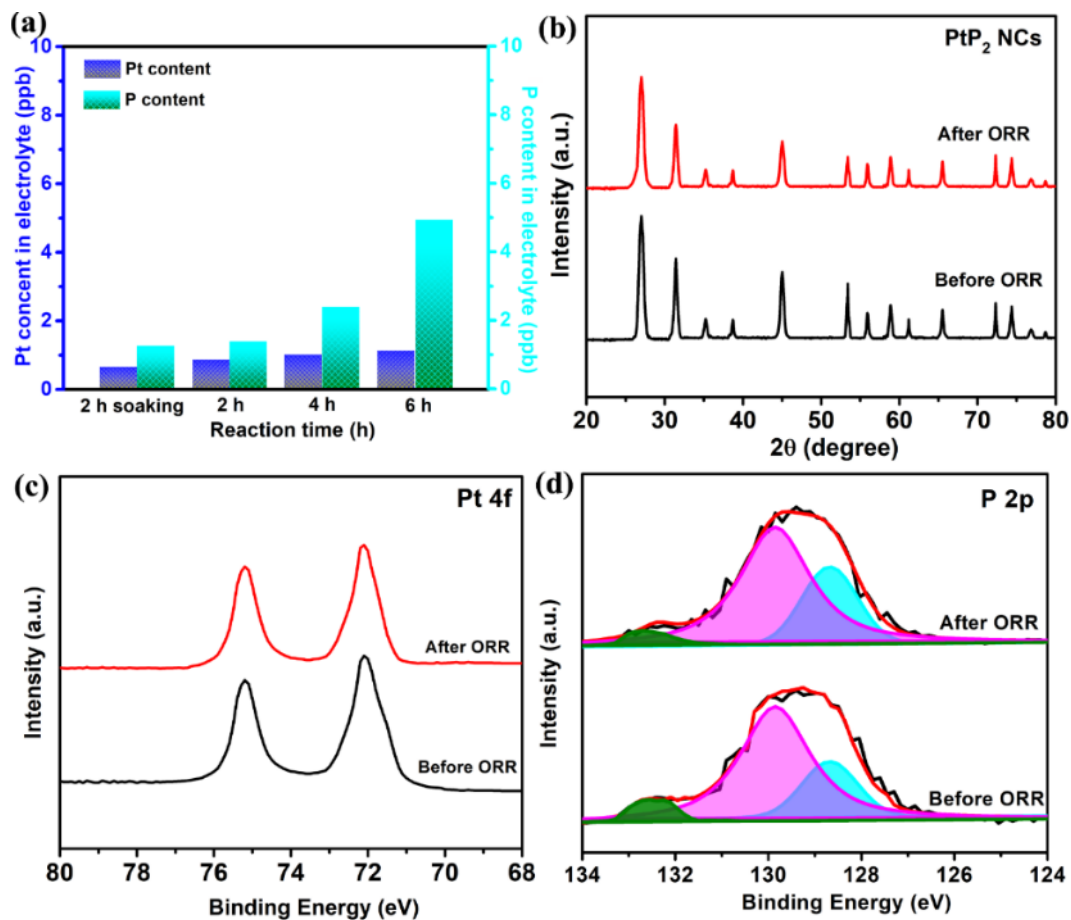

**Supplementary Figure 19.** Effect of extended ORR on structure. (a) Pt and P content in electrolyte, (b) XRD patterns, (c) Pt 4f, and (d) P 2p core levels of PtP<sub>2</sub> NCs before and after ORR under 0.4 V vs. RHE for 60 h in 0.1 M HClO<sub>4</sub>.

## Supplementary Figure 20

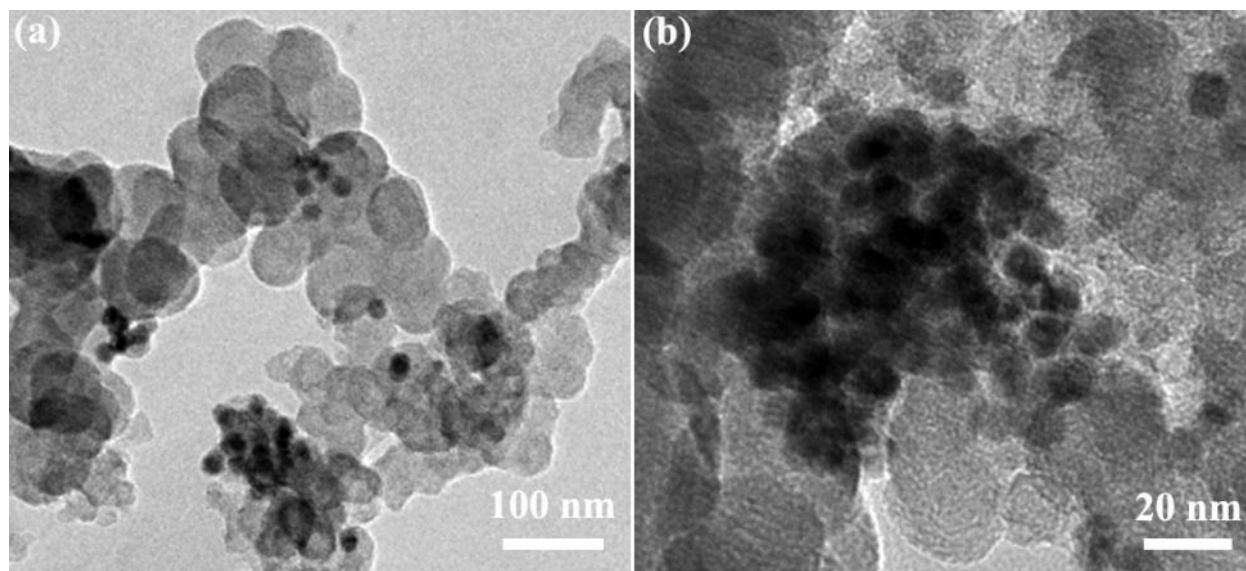

**Supplementary Figure 20.** Effect of extended ORR characterized by electron microscopy. (a) Low magnitude and (b) high magnitude TEM images of supported PtP<sub>2</sub> NCs after ORR for 60 h at 0.4 V vs. RHE in 0.1 M HClO<sub>4</sub>.

## Supplementary Figure 21

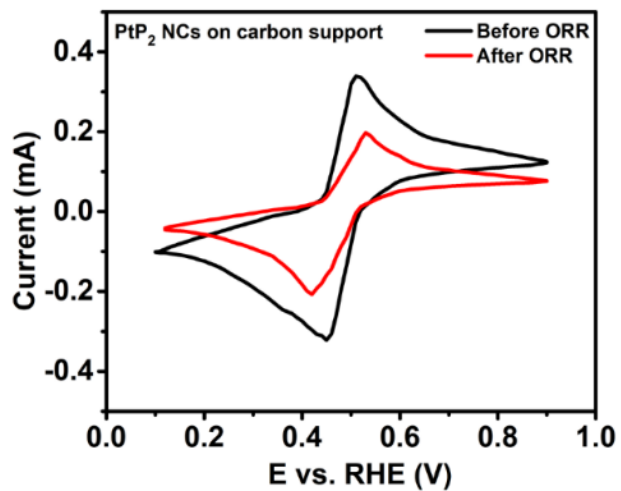

**Supplementary Figure 21.** Cyclic voltammetry curves of electrochemical active surface area (EASA) of supported fresh-PtP<sub>2</sub> and post-ORR PtP<sub>2</sub> in 5 mM K<sub>3</sub>Fe(CN)<sub>6</sub>/0.1 M HClO<sub>4</sub> solution with scan rate of 5 mV s<sup>-1</sup>.

## Supplementary Figure 22

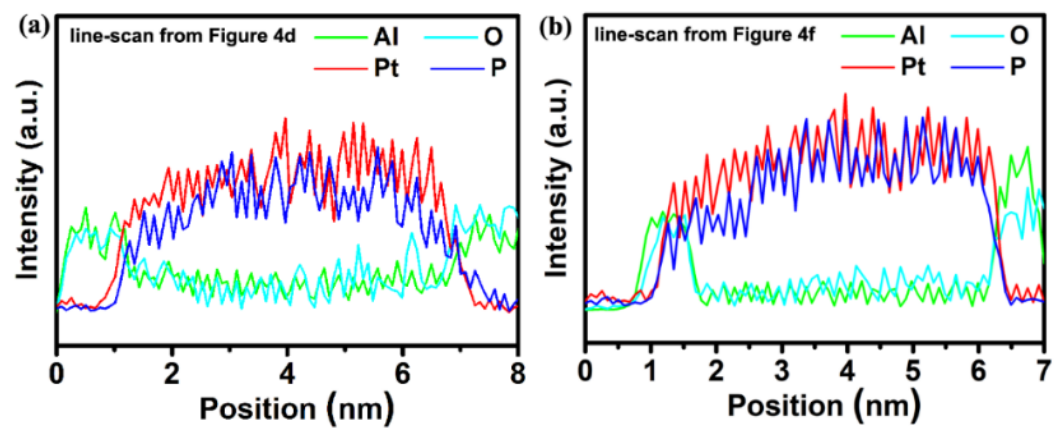

**Supplementary Figure 22.** High resolution characterization of elemental distribution in NC. Line-scan EDS from (a) Figure 4d and (b) Figure 4f. Carbon signal was removed for better comparison.

### Supplementary Figure 23

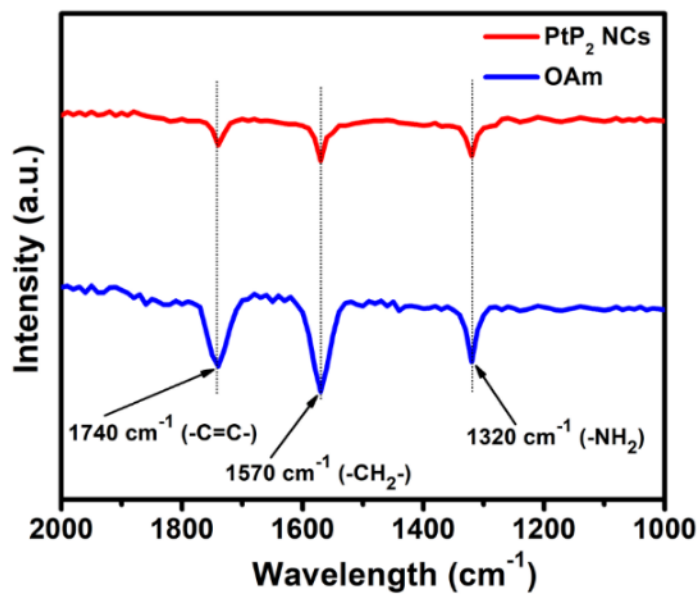

Supplementary Figure 23. FTIR spectra of pure PtP<sub>2</sub> NCs and organic ligand oleyamine (OAm).



Supplementary Figure 24

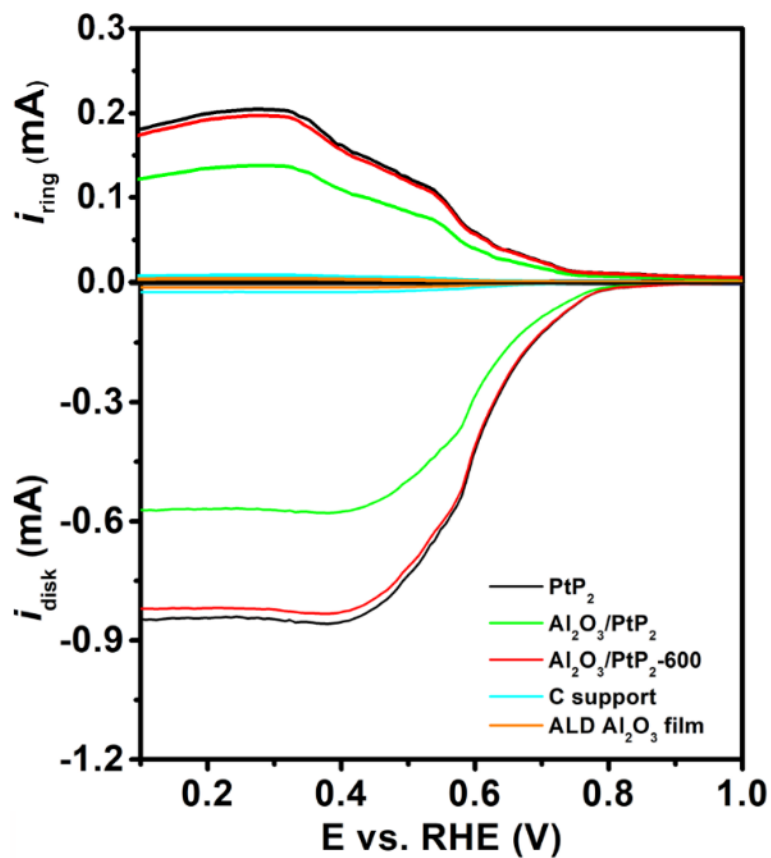

Supplementary Figure 24. Effect of ALD coating on ORR performance. RRDE voltammograms at 1600 rpm in O<sub>2</sub>-saturated electrolyte with the disc current and ring current for PtP<sub>2</sub>, Al<sub>2</sub>O<sub>3</sub>/PtP<sub>2</sub>, Al<sub>2</sub>O<sub>3</sub>/PtP<sub>2</sub>-600, and control samples of C support and ALD Al<sub>2</sub>O<sub>3</sub> thin film.

## Supplementary Figure 25

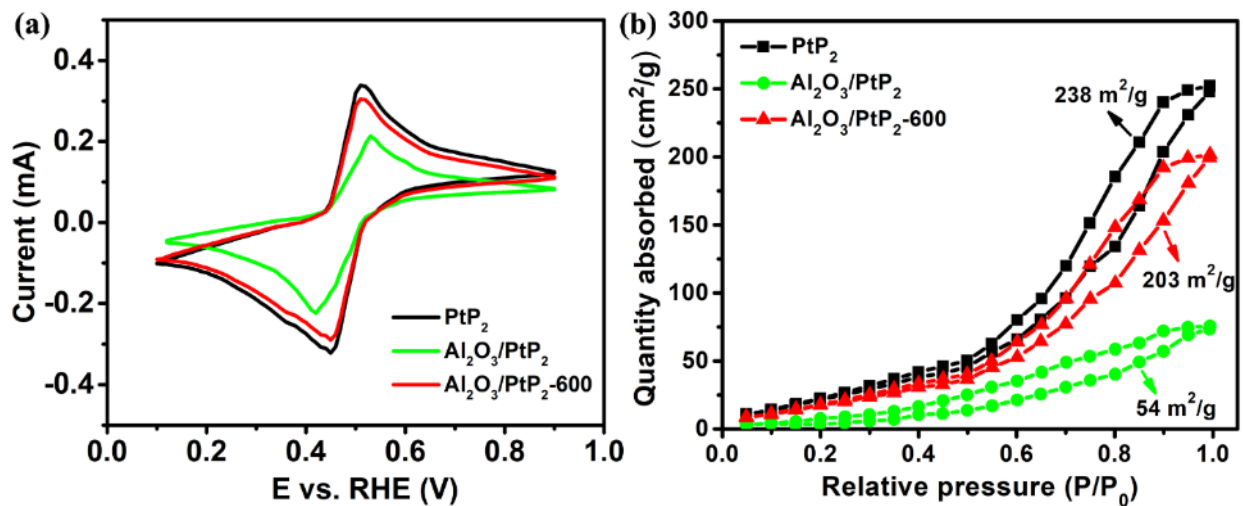

**Supplementary Figure 25.** Effect of ALD coating characterized by cyclic voltammetry and BET surface area. (a) Cyclic voltammetry curves of electrochemical active surface area (EASA) of supported PtP<sub>2</sub>, Al<sub>2</sub>O<sub>3</sub>/PtP<sub>2</sub>, and Al<sub>2</sub>O<sub>3</sub>/PtP<sub>2</sub>-600 in 5 mM K<sub>3</sub>Fe(CN)<sub>6</sub>/0.1 M HClO<sub>4</sub> solution with scan rate of 5 mV s<sup>-1</sup> and (b) BET surface area for PtP<sub>2</sub>, Al<sub>2</sub>O<sub>3</sub>/PtP<sub>2</sub>, and Al<sub>2</sub>O<sub>3</sub>/PtP<sub>2</sub>-600.

## Supplementary Figure 26

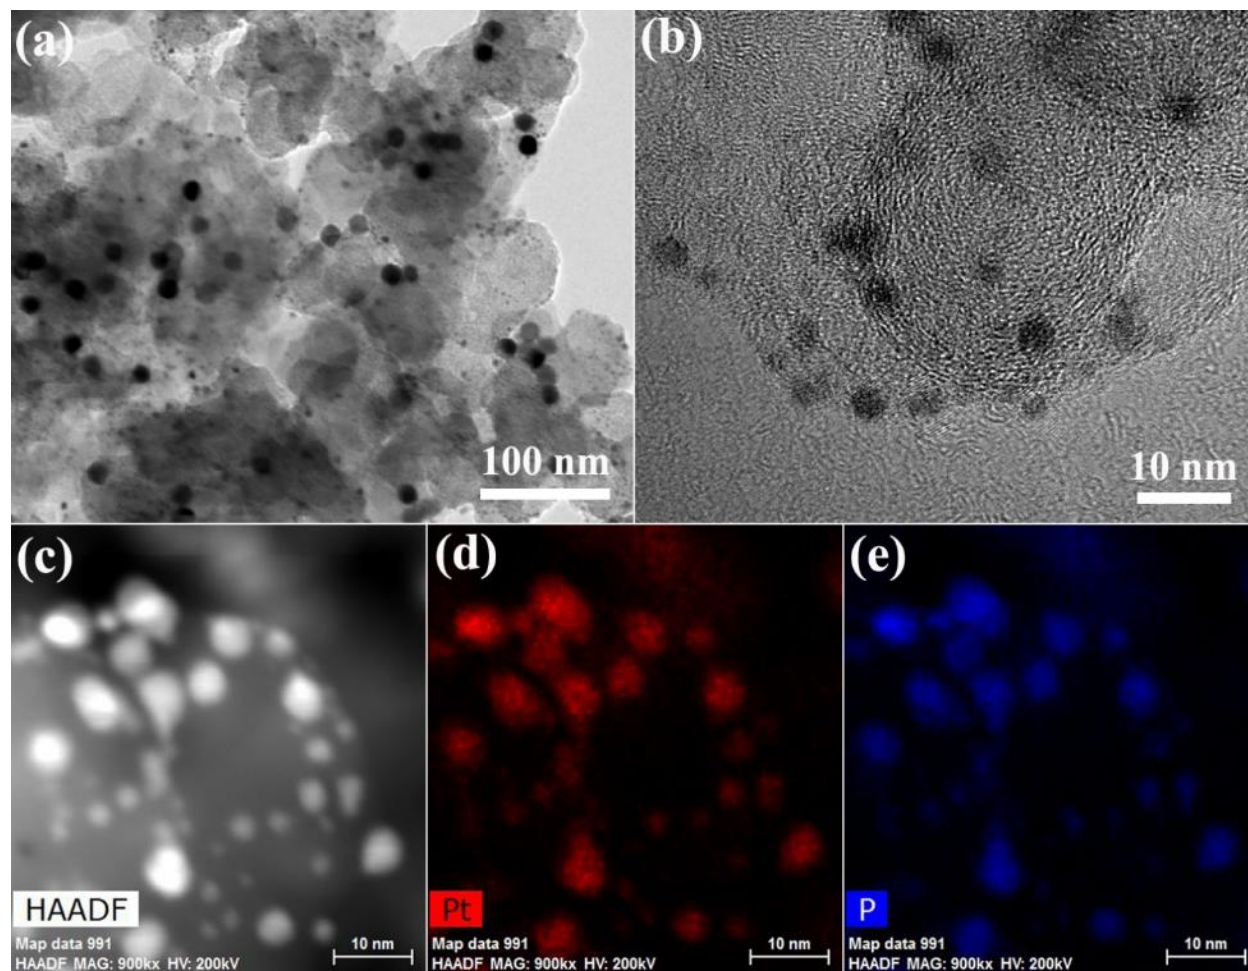

**Supplementary Figure 26.** Electron microscopy characterization of ALD coated NCs. (a) TEM, (b) HRTEM, (c) HAADF-STEM, and (d,e) elemental mapping for supported  $\text{Al}_2\text{O}_3/\text{PtP}_2\text{-600}$  electrocatalyst after ORR measurement at 0.4 V vs. RHE for 60 h.

## Supplementary Figure 27

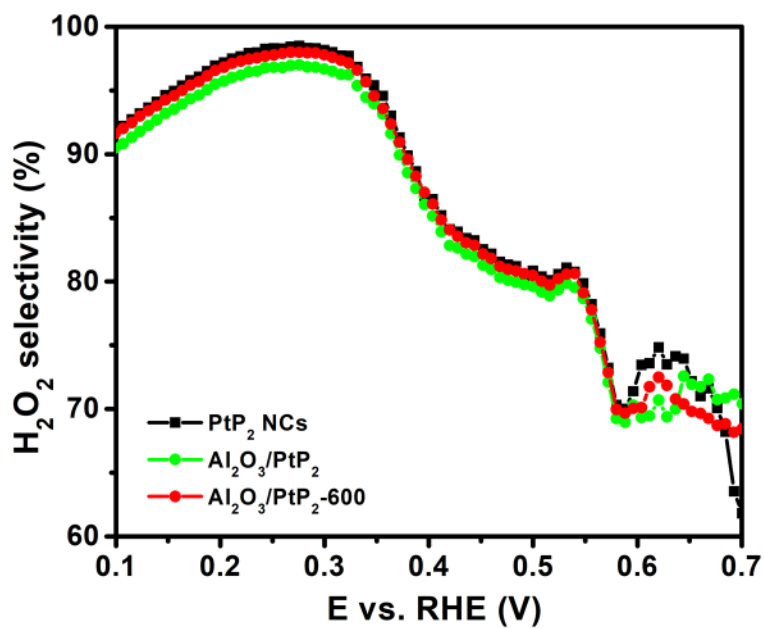

**Supplementary Figure 27.** The percentage of hydrogen peroxide of PtP<sub>2</sub>, Al<sub>2</sub>O<sub>3</sub>/PtP<sub>2</sub>, and Al<sub>2</sub>O<sub>3</sub>/PtP<sub>2</sub>-600 within the scan range of 0.1-0.7 V vs. RHE. The electrolyte is 0.1 M HClO<sub>4</sub> (pH = 1).

## Supplementary Figure 28

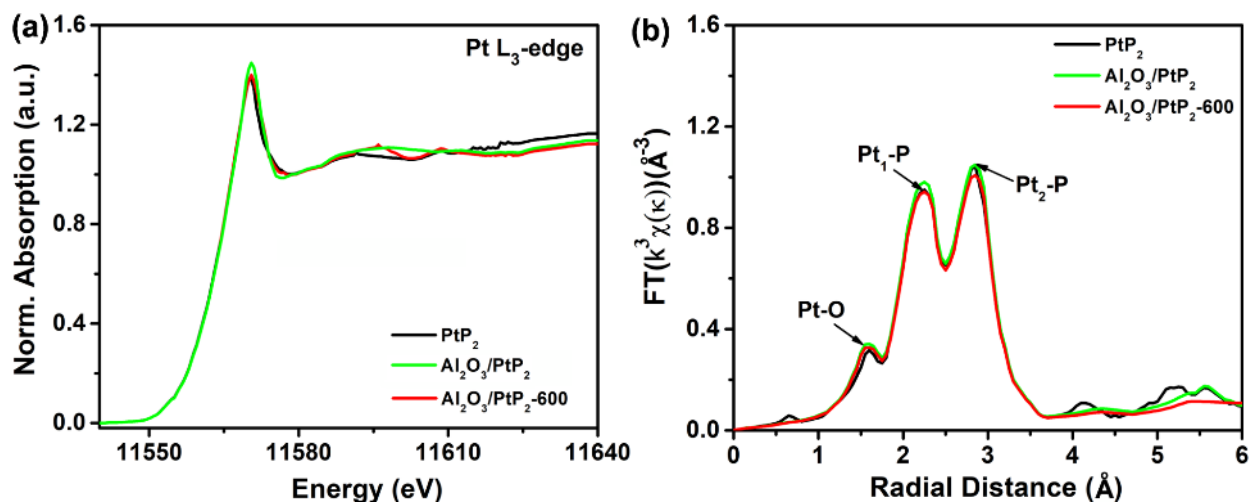

**Supplementary Figure 28.** XANES and EXAFS characterization of pre- and post-ALD samples.

(a) Pt L<sub>3</sub>-edge XANES and (b) EXAFS spectra of as-prepared PtP<sub>2</sub>, Al<sub>2</sub>O<sub>3</sub>/PtP<sub>2</sub>, and Al<sub>2</sub>O<sub>3</sub>/PtP<sub>2</sub>-600.

## Supplementary Figure 29

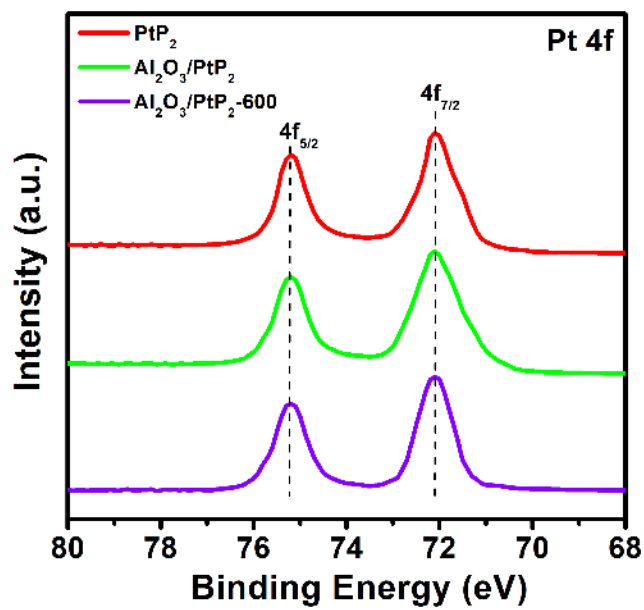

Supplementary Figure 29. Pt 4f core level of PtP<sub>2</sub>, Al<sub>2</sub>O<sub>3</sub>/PtP<sub>2</sub>, and Al<sub>2</sub>O<sub>3</sub>/PtP<sub>2</sub>-600.

### Supplementary Figure 30

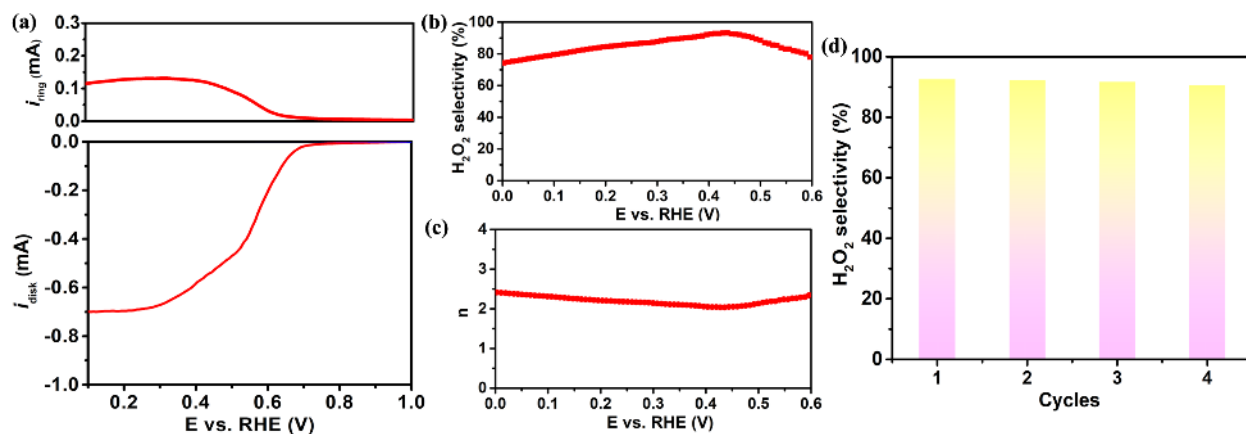

**Supplementary Figure 30.** RRDE voltammograms of Al<sub>2</sub>O<sub>3</sub>/PtP<sub>2</sub>-600 measured at 1600 rpm in O<sub>2</sub>-saturated 0.5 K<sub>2</sub>SO<sub>4</sub> electrolyte (pH = 7). (a) Linear sweep voltammetry with disk and ring current. (b) H<sub>2</sub>O<sub>2</sub> selectivity and (c) electron transfer number as a functional of applied potential. (d) Cyclic stability.

## Supplementary Figure 31

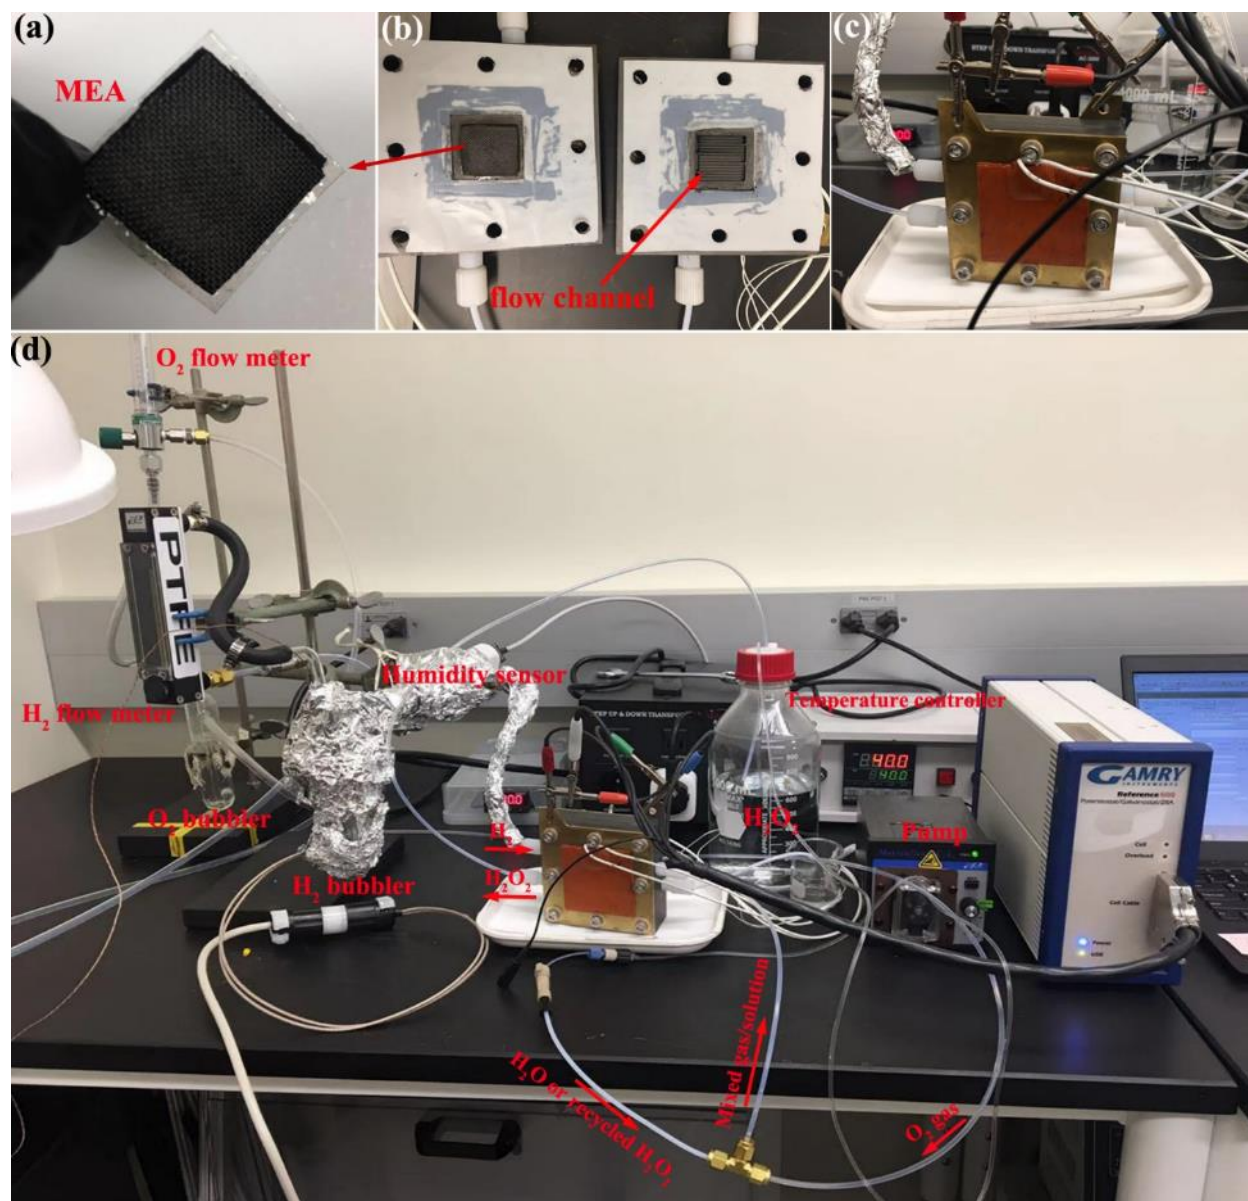

**Supplementary Figure 31.** Diagram of experimental apparatus. (a) Membrane electrode assembly (MEA), (b,c) single fuel cell reactor, and (d) overall  $H_2$ - $O_2$  fuel cell set-up for direct electrosynthesis of neutral  $H_2O_2$ .



### Supplementary Figure 32

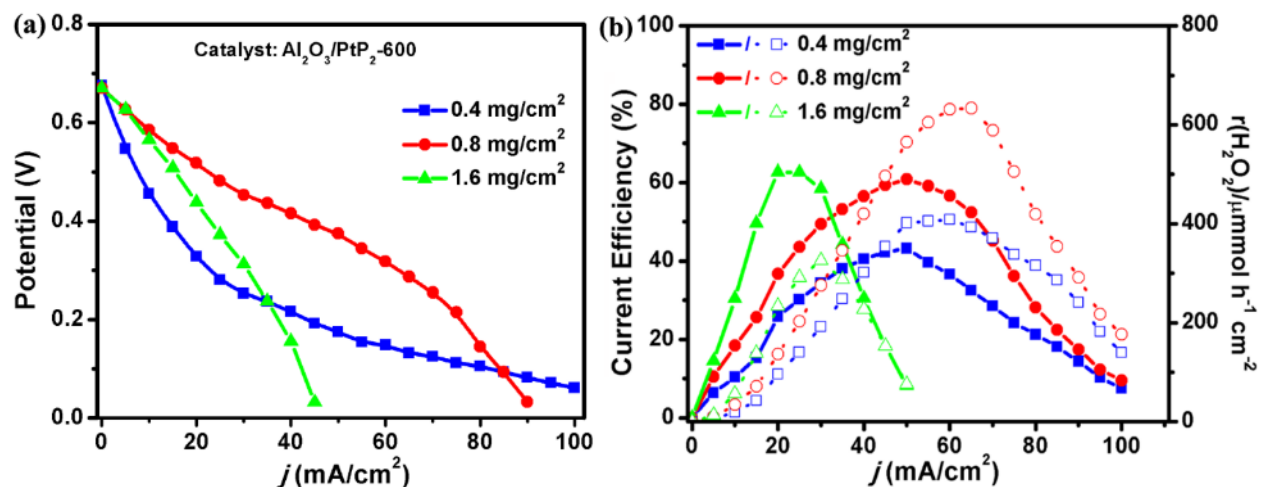

**Supplementary Figure 32.** Effect of catalyst loading. (a)  $j$ - $V$  polarization curves and (b) current efficiency and  $\text{H}_2\text{O}_2$  production rate as a function of current density under various cathode catalyst loading. Cathodic conditions: no Teflon, water flow rate of  $5 \text{ mL min}^{-1}$ , and fuel cell operation temperature of  $80 \text{ }^\circ\text{C}$ .

### Supplementary Figure 33

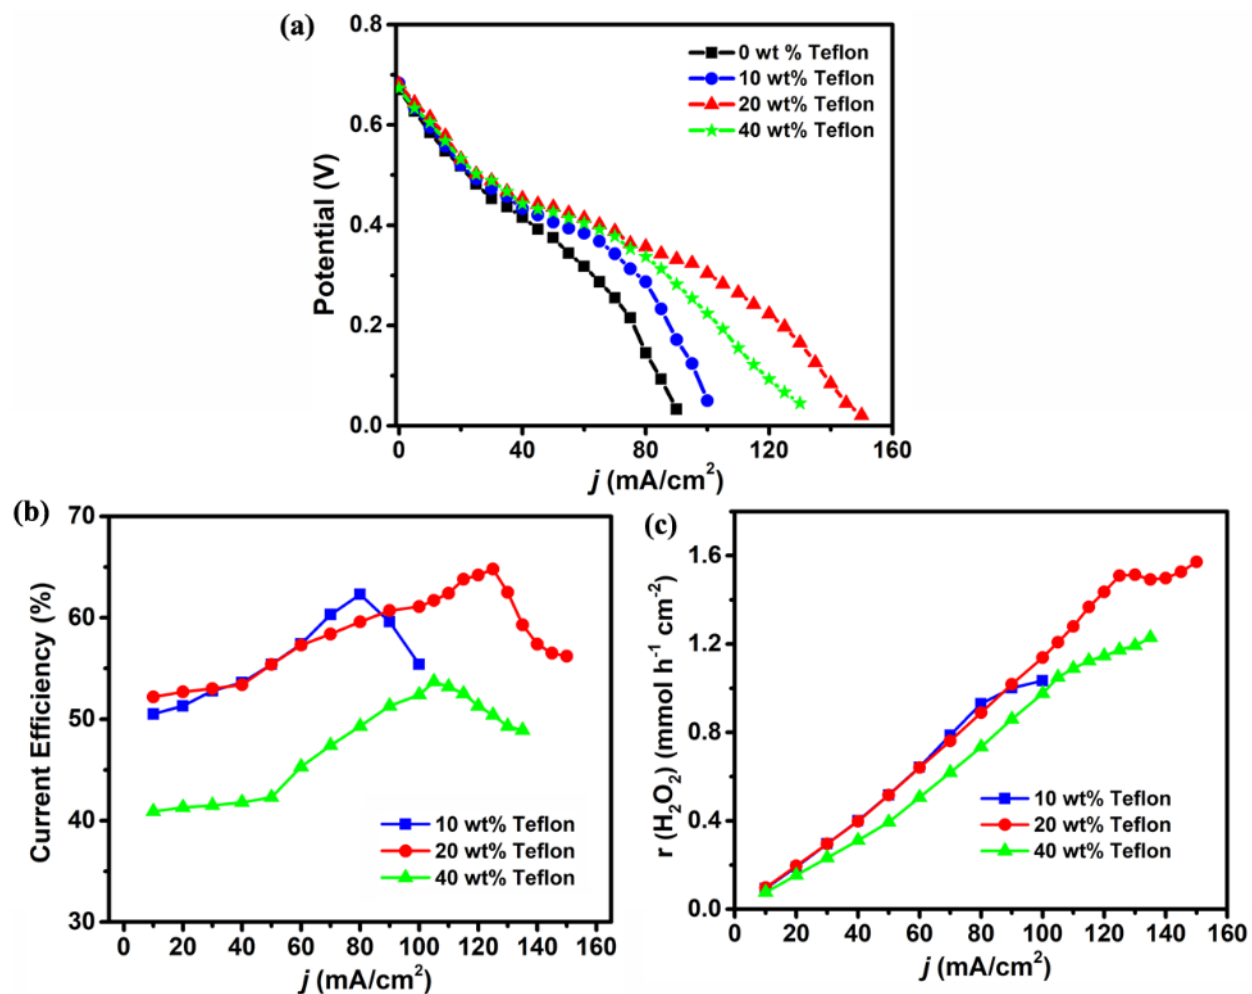

**Supplementary Figure 33.** Effect of Teflon content. (a) Polarization curves, (b) current efficiency, and (c) H<sub>2</sub>O<sub>2</sub> production rate. Cathodic conditions: catalyst loading of 0.8 mg cm<sup>-2</sup>, water flow rate of 5 mL min<sup>-1</sup>, and fuel cell operation temperature of 80 °C.

### Supplementary Figure 34

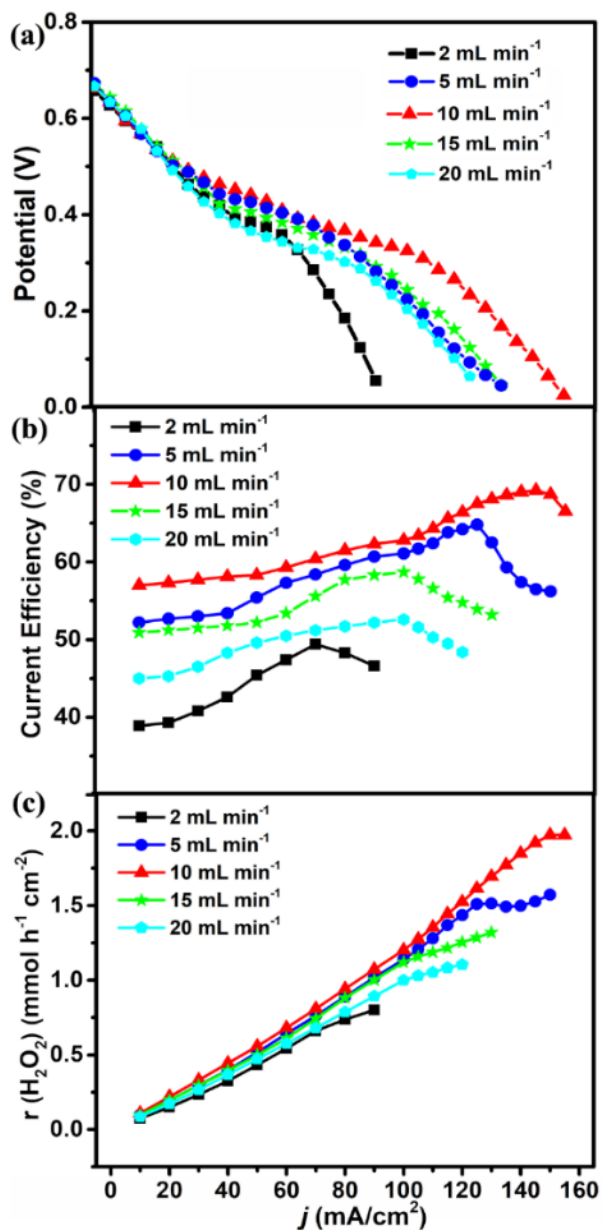

**Supplementary Figure 34.** Effect of water flow rate effect. (a) Polarization curves, (b) current efficiency, and (c)  $\text{H}_2\text{O}_2$  production rate. Cathodic conditions: catalyst loading of  $0.8 \text{ mg cm}^{-2}$ , 20 wt% Teflon, and fuel cell operation temperature of  $80 \text{ }^\circ\text{C}$ .

## Supplementary Figure 35

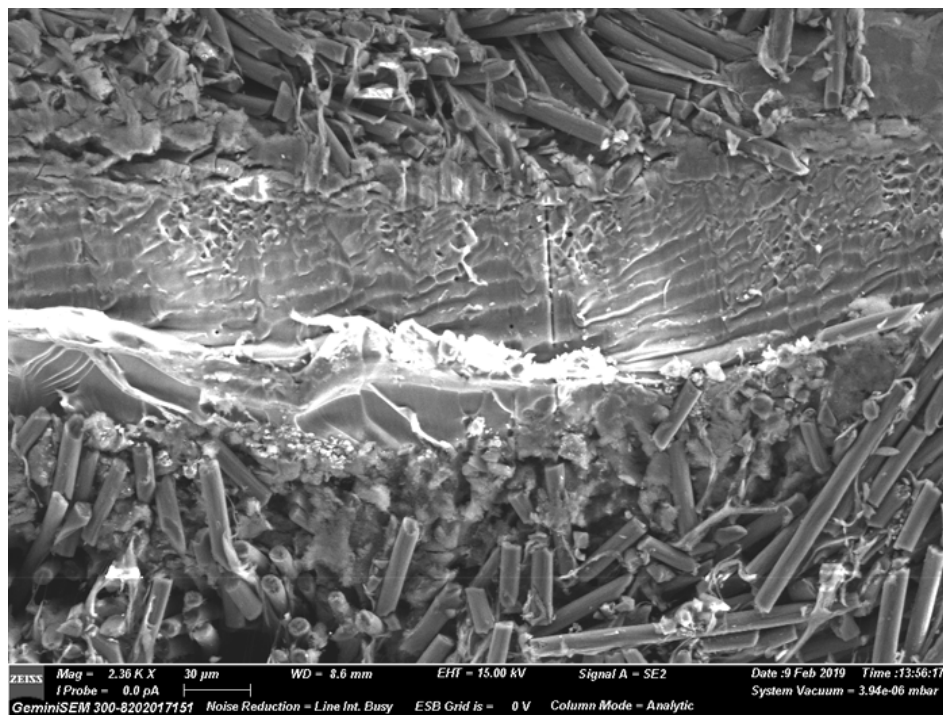

**Supplementary Figure 35.** Cross-sectional SEM image of the Pt/Nafion/Al<sub>2</sub>O<sub>3</sub>-PtP<sub>2</sub>-600 MEA after 120 h at optimized conditions in H<sub>2</sub>-O<sub>2</sub> fuel cell.

### Supplementary Figure 36

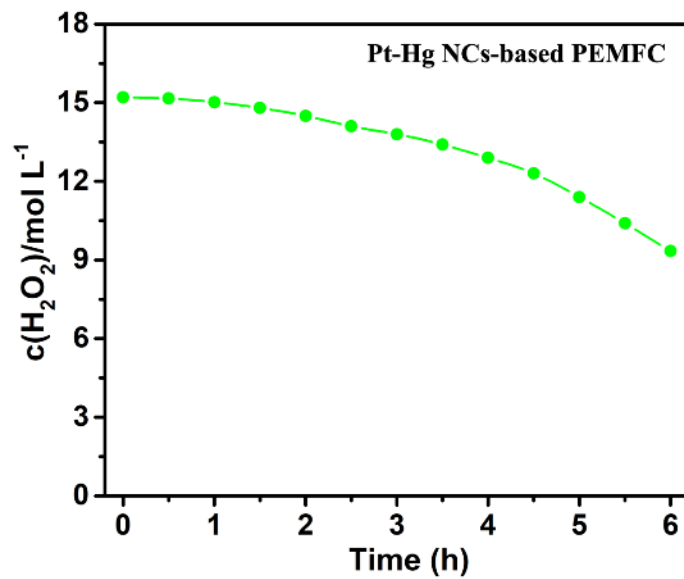

**Supplementary Figure 36.** Time-dependent neutral  $\text{H}_2\text{O}_2$  concentration measured at a constant potential of 0.4 V for 6 h.

### Supplementary Figure 37

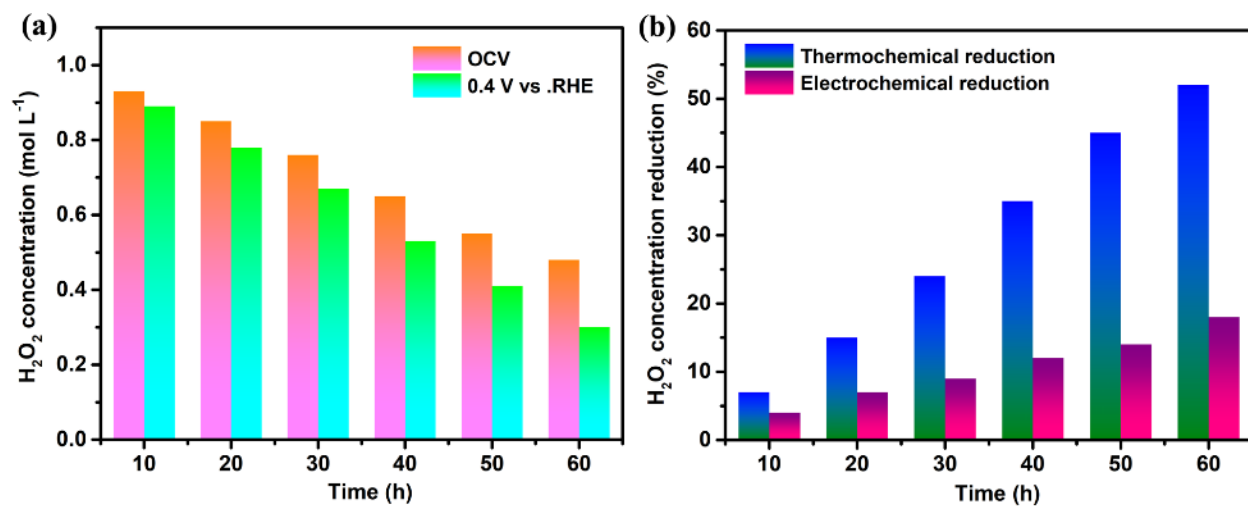

**Supplementary Figure 37.** Characterization of system under extended measurement. (a) Time-dependent H<sub>2</sub>O<sub>2</sub> concentration measured at open-circuit voltage (OCV) and 0.4 V vs. RHE in an O<sub>2</sub>-free 1 M H<sub>2</sub>O<sub>2</sub> solution. (b) Time-dependent H<sub>2</sub>O<sub>2</sub> concentration degradation from thermochemical and electrochemical reduction pathways.

### Supplementary Figure 38

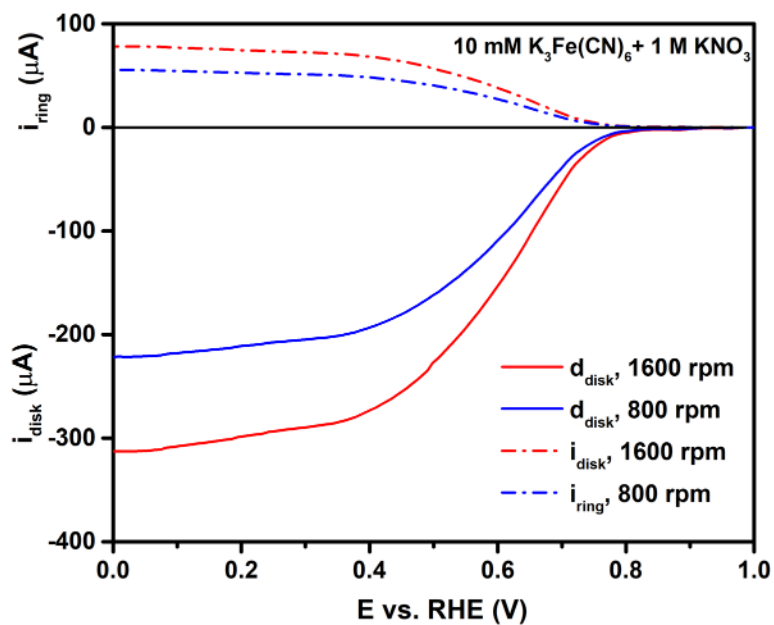

**Supplementary Figure 38.** LSV curves of the used RRDE in an  $O_2$ -saturated 0.1 M  $HClO_4$  at a rotation speed of 800 and 1600 rpm ( $10 \text{ mV s}^{-1}$ ). The collection efficiency  $N$  is calculated to be 0.25, quite close to the theoretical value of old MTI34 RRDE from the Pine company.

## Supplementary Table 1

**Supplementary Table 1.** Elemental composition determined by ICP-MS of Pt and P in the pristine and modified PtP<sub>2</sub> samples before and after ORR in acidic or neutral solution.

| Sample                                                                 | Weight% Pt | Weight% P | Atomic ratio Pt:P |
|------------------------------------------------------------------------|------------|-----------|-------------------|
| PtP <sub>2</sub> (as synthesized)                                      | 74.3       | 23.7      | 0.498             |
| PtP <sub>2</sub> (after acid-treatment)                                | 73.7       | 23.2      | 0.504             |
| PtP <sub>2</sub> (after ORR)                                           | 72.6       | 22.4      | 0.514             |
| Al <sub>2</sub> O <sub>3</sub> /PtP <sub>2</sub> -600 (as synthesized) | 66.5       | 21.5      | 0.496             |
| Al <sub>2</sub> O <sub>3</sub> /PtP <sub>2</sub> -600 (after ORR)      | 65.8       | 21.3      | 0.491             |



## Supplementary Table 2

**Supplementary Table 2.** Fitting results of Pt L<sub>3</sub>-K edge EXAFS data. The coordination number (CN) and bond length obtained from the EXAFS spectra of the PtP<sub>2</sub> NCs and Pt NCs. Commercial PtO<sub>2</sub>, PtCl<sub>2</sub>, and Pt foil were used as references.

| Sample               | Bond               | CN   | R (Å)       | $\sigma^2$ ( $10^{-3}$ Å <sup>2</sup> ) | R factor |
|----------------------|--------------------|------|-------------|-----------------------------------------|----------|
| PtP <sub>2</sub> NCs | Pt <sub>1</sub> -P | 7.2  | 2.20 ± 0.03 | 4.2                                     | 0.0082   |
| PtP <sub>2</sub> NCs | Pt <sub>2</sub> -P | 6.6  | 2.85 ± 0.02 | 8.7                                     | 0.0082   |
| Pt NCs               | Pt-Pt              | 10.9 | 2.75 ± 0.02 | 5.8                                     | 0.0064   |
| Pt NCs               | Pt-Pt              | 7.5  | 2.89 ± 0.01 | 6.9                                     | 0.0064   |
| PtO <sub>2</sub>     | Pt-O               | 6.3  | 1.65 ± 0.01 | 7.1                                     | 0.0062   |
| PtO <sub>2</sub>     | Pt-Pt              | 7.2  | 2.71 ± 0.01 | 5.3                                     | 0.0062   |
| PtCl <sub>2</sub>    | Pt-Cl              | 6.4  | 1.60 ± 0.02 | 4.9                                     | 0.0082   |
| Pt foil              | Pt-Pt              | 12.0 | 2.73 ± 0.01 | 4.0                                     | 0.0044   |

### Supplementary Table 3

**Table 3.** Explanation of mass activity calculations for different electrocatalysts presented in Figure 2b of the main text.

| Sample                              | Electrolyte                           | Loading<br>(mg cm <sup>-2</sup> ) | Comment on mass activity calculation                                                                                                                                                                                | Ref. |
|-------------------------------------|---------------------------------------|-----------------------------------|---------------------------------------------------------------------------------------------------------------------------------------------------------------------------------------------------------------------|------|
| Au-Pd                               | 0.1 M HClO <sub>4</sub>               | 0.020                             | For the optimized Au <sub>0.7</sub> Pd <sub>0.3</sub> /C, the generated H <sub>2</sub> O <sub>2</sub> can be obtained by combining the ring current from Figure 5B with the mass loading and collection efficiency. | 3    |
| Pt-Hg                               | 0.1 M HClO <sub>4</sub>               | 0.014                             | The generated H <sub>2</sub> O <sub>2</sub> can be obtained by the calculated peroxide current from Figure 4b and mass loading.                                                                                     | 4    |
| Pd-Hg                               | 0.1 M HClO <sub>4</sub>               |                                   | The generated H <sub>2</sub> O <sub>2</sub> can be obtained by the calculated peroxide current from Figure 3d and mass loading.                                                                                     | 5    |
| Pt/HSC                              | 0.1 M HClO <sub>4</sub>               | 0.050                             | The generated H <sub>2</sub> O <sub>2</sub> can be obtained by H <sub>2</sub> O <sub>2</sub> selectivity and polarization curve from Figure 3b and d. N <sub>collection</sub> = 0.2                                 | 6    |
| Pt/TiN                              | 0.1 M HClO <sub>4</sub>               | 0.175                             | The generated H <sub>2</sub> O <sub>2</sub> can be obtained by ring current from Figure 3a, collection efficiency, and mass loading.                                                                                | 7    |
| Co-N-C                              | 0.5 M H <sub>2</sub> SO <sub>4</sub>  | 0.100                             | The generated H <sub>2</sub> O <sub>2</sub> can be obtained by ring current from Figure 2a. A <sub>disk</sub> = 0.196 cm <sup>2</sup> ; N <sub>collection</sub> = 0.37.                                             | 8    |
| Au-Pd                               | 0.1 M HClO <sub>4</sub>               | 0.010                             | The generated H <sub>2</sub> O <sub>2</sub> can be obtained by ring current from Figure 3B, collection efficiency, and mass loading.                                                                                | 9    |
| CoS <sub>2</sub>                    | 0.05 M H <sub>2</sub> SO <sub>4</sub> | 0.305                             | The generated H <sub>2</sub> O <sub>2</sub> can be obtained by ring current from Figure 2a A <sub>disk</sub> = 0.126 cm <sup>2</sup> ; N <sub>collection</sub> = 0.43.                                              | 10   |
| Co <sub>1</sub> -NG(O)              | 0.1 M HClO <sub>4</sub>               | 0.010                             | The generated H <sub>2</sub> O <sub>2</sub> can be obtained by ring current from Figure 3f. A <sub>disk</sub> = 0.2475 cm <sup>2</sup> ; N <sub>collection</sub> = 0.356.                                           | 11   |
| h-Pt <sub>1</sub> -CuS <sub>x</sub> | 0.1 M HClO <sub>4</sub>               | 0.015                             | The generated H <sub>2</sub> O <sub>2</sub> can be obtained by ring current from Figure 4a. A <sub>disk</sub> = 0.2475 cm <sup>2</sup> ; N <sub>collection</sub> = 0.37.                                            | 12   |

### Supplementary Table 4

**Supplementary Table 4.** ICP-MS concentrations in the solution after 6 h of ORR in 0.1 M HClO<sub>4</sub>.

The applied potential for RRDE is fixed at 0.5 V vs. RHE. The mass loading is 0.2 mg/cm<sup>2</sup>. The background concentrations in the electrolyte was subtracted for all the reported values.

| Samples          | Volume of solution (mL) | [Pt] (ppb) | [P] (ppb) | [Hg] (ppb)             |
|------------------|-------------------------|------------|-----------|------------------------|
| PtP <sub>2</sub> | 40                      | 5.8        | 24.4      | –                      |
| Pt-Hg            | 40                      | 64.5       | –         | 74.6 × 10 <sup>3</sup> |

## Supplementary Table 5

**Supplementary Table 5.** The absorption edge ( $E_0$ ) and corresponding oxidation state ( $\delta$ ) of Pt in PtP<sub>2</sub> NCs under various applied potential (vs. RHE). PtO<sub>2</sub>, PtCl<sub>2</sub>, and Pt foil are used as references.

| Samples    | PtP <sub>2</sub><br>(Pristine) | PtP <sub>2</sub><br>(OCP) | PtP <sub>2</sub><br>(0.9 V) | PtP <sub>2</sub><br>(0.7 V) | PtP <sub>2</sub><br>(0.5 V) | PtP <sub>2</sub><br>(0.3 V) | PtO <sub>2</sub> | PtCl <sub>2</sub> | Pt foil |
|------------|--------------------------------|---------------------------|-----------------------------|-----------------------------|-----------------------------|-----------------------------|------------------|-------------------|---------|
| $E_0$ (eV) | 11567.3                        | 11567.4                   | 11567.4                     | 11566.7                     | 11566.4                     | 11566.4                     | 11567.7          | 11566.2           | 11565.5 |
| $\delta$   | 3.27                           | 3.29                      | 3.29                        | 2.72                        | 2.25                        | 2.25                        | 4.00             | 2.00              | 0       |

## Supplementary Table 6

**Supplementary Table 6.** Experimental variables for direct electrosynthesis of neutral H<sub>2</sub>O<sub>2</sub> in a continuous H<sub>2</sub>-O<sub>2</sub> fuel cell with 4 cm<sup>2</sup> geometric electrode area.

| Property                                               | Value | Current density (mA cm <sup>-2</sup> ) | H <sub>2</sub> O <sub>2</sub> concentration (mmol L <sup>-1</sup> ) | Maximum current efficiency (%) | H <sub>2</sub> O <sub>2</sub> production rate (mmol h <sup>-1</sup> cm <sup>-2</sup> ) |
|--------------------------------------------------------|-------|----------------------------------------|---------------------------------------------------------------------|--------------------------------|----------------------------------------------------------------------------------------|
| Catalyst loading <sup>[1]</sup> (mg cm <sup>-2</sup> ) | 4.0   | 50                                     | 5.37                                                                | 43.2                           | 0.41                                                                                   |
| Catalyst loading (mg cm <sup>-2</sup> )                | 8.0   | 50                                     | 7.56                                                                | 60.8                           | 0.57                                                                                   |
| Catalyst loading (mg cm <sup>-2</sup> )                | 16.0  | 20                                     | 3.12                                                                | 62.7                           | 0.24                                                                                   |
| Teflon treatment <sup>[2]</sup> (wt%)                  | 10    | 80                                     | 12.40                                                               | 62.3                           | 0.93                                                                                   |
| Teflon treatment (wt%)                                 | 20    | 125                                    | 20.15                                                               | 64.8                           | 1.51                                                                                   |
| Teflon treatment (wt%)                                 | 40    | 105                                    | 14.03                                                               | 53.7                           | 1.05                                                                                   |
| Water flow rate <sup>[3]</sup> (mL min <sup>-1</sup> ) | 2     | 70                                     | 21.88                                                               | 49.4                           | 0.66                                                                                   |
| Water flow rate (mL min <sup>-1</sup> )                | 5     | 125                                    | 20.15                                                               | 64.8                           | 1.51                                                                                   |
| Water flow rate (mL min <sup>-1</sup> )                | 10    | 145                                    | 12.48                                                               | 69.2                           | 1.92                                                                                   |
| Water flow rate (mL min <sup>-1</sup> )                | 15    | 100                                    | 4.87                                                                | 58.7                           | 1.12                                                                                   |
| Water flow rate (mL min <sup>-1</sup> )                | 20    | 100                                    | 3.27                                                                | 52.6                           | 1.00                                                                                   |
| Operating temperature <sup>[4]</sup> (°C)              | RT    | 120                                    | 7.99                                                                | 53.5                           | 1.23                                                                                   |
| Operating temperature (°C)                             | 40    | 150                                    | 14.70                                                               | 78.8                           | 2.26                                                                                   |
| Operating temperature (°C)                             | 60    | 140                                    | 12.62                                                               | 72.5                           | 1.94                                                                                   |
| Operating temperature (°C)                             | 80    | 145                                    | 12.48                                                               | 69.2                           | 1.92                                                                                   |

[1] Cathode conditions: O<sub>2</sub> flow rate (150 mL min<sup>-1</sup>), GDL Teflon content (0 wt%), water flow rate (5 mL min<sup>-1</sup>), cell temperature (80 °C).

[2] Cathode conditions: O<sub>2</sub> flow rate (150 mL min<sup>-1</sup>), catalyst mass loading (0.8 mg cm<sup>-2</sup>), water flow rate (5 mL min<sup>-1</sup>), cell temperature (80 °C).

[3] Cathode conditions: O<sub>2</sub> flow rate (150 mL min<sup>-1</sup>), catalyst mass loading (0.8 mg cm<sup>-2</sup>), GDL Teflon content (20 wt%), cell temperature (80 °C).

[4] Cathode conditions: O<sub>2</sub> flow rate (150 mL min<sup>-1</sup>), catalyst mass loading (0.8 mg cm<sup>-2</sup>), GDL Teflon content (20 wt%), water flow rate (10 mL min<sup>-1</sup>).

The anode conditions for [1-4] are: H<sub>2</sub> flow rate (100 mL min<sup>-1</sup>), Pt/C catalyst loading (1.0 mg<sub>Pt</sub> cm<sup>-2</sup>).

## Supplementary Table 7

**Supplementary Table 7.** ICP-MS concentrations of the neutral catholyte solution in PtP<sub>2</sub> and Pt-Hg NCs-based PEMFC following non-recycle mode operation for 6 h. The applied potential is fixed at 0.4 V.

| Cathodes in<br>PEMFC | [Pt] (ppb) | [P] (ppb) | [Hg] (ppb)        |
|----------------------|------------|-----------|-------------------|
| PtP <sub>2</sub>     | 5.8        | 11.7      | –                 |
| Pt-Hg                | 15.8       | –         | $5.9 \times 10^3$ |

## Supplementary Methods

**Computation details:** First principles calculations were carried out using the Materials Studio with norm-conserving pseudopotentials and generalized gradient approximation (GGA) exchange-correlation functionals parameterized by Perdew-Burke-Enzerhof (PBE)<sup>13</sup>. A self-consistency convergence criterion of  $10^{-6}$  eV was used for all calculations. All the structures were fully relaxed until force components on atoms were less than  $10^{-3}$  eV/Å. The number of plane-waves was determined by a kinetic energy cutoff of 571.4 eV. Monkhorst-Pack grids with a maximum separation of  $0.04 \text{ \AA}^{-1}$  between k-points were used for sampling the Brillouin zone. This sampling density was checked with respect to the convergence of the bulk PtP<sub>2</sub> and Pt total energies, corresponding to a  $4 \times 4 \times 1$  k-point grid for the reciprocal space of the 12-atom PtP<sub>2</sub> primitive cell and the 4-atom Pt primitive cell. We studied free energy and binding energy of reaction intermediates adsorbed on PtP<sub>2</sub> (111) and Pt (111) surfaces with supercells separated by vacuum of 15 Å thickness. The slab thickness and the vacuum separation were chosen to converge the total energy of the systems into  $10^{-3}$  eV.

**Computation of free-energy for the ORR:** We consider the associative mechanism with OOH\*, O\* and OH\* as ORR intermediates for both the two (equation 1,2) and four (equation 1,3,4,5) electrons ORR reaction on PtP<sub>2</sub> and Pt in acidic solution.

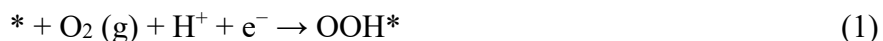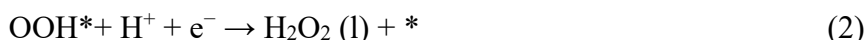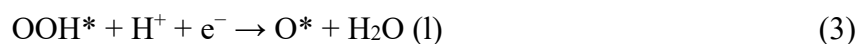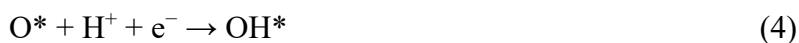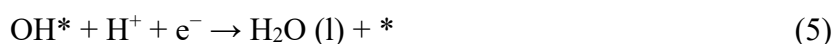

where \* and X\* represent an adsorption site and an adsorbed intermediate on the surface, respectively. To estimate the adsorption energy of different intermediates at zero potential and pH

= 0, we calculated the reaction energy of each individual intermediate and corrected the for zero-point energy (ZPE) and entropy (TS) using the equation:  $\Delta G = \Delta E + \Delta ZPE - T\Delta S$ . The entropy ( $\Delta S$ ) and zero-point energy corrections ( $\Delta ZPE$ ) were determined by employing the computed vibrational frequencies and standard tables for the reactants and products in the gas phase. Additionally, we used the computational hydrogen electrode (CHE) approach which exploits that the chemical potential of a proton-electron pair is equal to that of gas-phase  $H_2$  at  $U = 0.0$  V vs. the reversible hydrogen electrode (RHE). The effect of the electrode potential on the free energy of the intermediates is taken into account through shifting the electron energy by  $-eU$  where  $e$  and  $U$  are the elementary charge and the electrode potential, respectively<sup>14</sup>. A formation energy for the water molecule of -2.46 eV was adopted and a solvation energy (-0.22 eV) is applied to correct  $\Delta E_{OH^*}$  and  $\Delta E_{OOH^*}$ <sup>14</sup>. The reaction overpotential could be obtained by evaluating the difference between the reversible potential (1.23 V vs. RHE for 4e ORR or 0.70 V vs. RHE for 2e ORR) and the corresponding voltage needed for changing all the free-energy steps into downhill.



## Supplementary References

- 1 Mazumder, V. & Sun, S. Oleylamine-mediated synthesis of Pd nanoparticles for catalytic Formic acid oxidation. *J. Am. Chem. Soc.* **131**, 4588-4589 (2009).
- 2 Mazumder, V. et al. A facile synthesis of MPd (M = Co, Cu) nanoparticles and their catalysis for formic acid oxidation. *Nano Lett.* **12**, 1102-1106 (2012).
- 3 Jirkovsky, J. S. et al. Single atom hot-spots at Au-Pd nanoalloys for electrocatalytic H<sub>2</sub>O<sub>2</sub> production. *J. Am. Chem. Soc.* **133**, 19432-19441 (2011).
- 4 Siahrostami, S. et al. Enabling direct H<sub>2</sub>O<sub>2</sub> production through rational electrocatalyst design. *Nat. Mater.* **12**, 1137-1143 (2013).
- 5 Verdaguier-Casadevall, A. et al. Trends in the electrochemical synthesis of H<sub>2</sub>O<sub>2</sub>: enhancing activity and selectivity by electrocatalytic site engineering. *Nano Lett.* **14**, 1603-1608 (2014).
- 6 Choi, C. H. et al. Tuning selectivity of electrochemical reactions by atomically dispersed platinum catalyst. *Nat. Commun.* **7**, 10922 (2016).
- 7 Yang, S., Kim, J., Tak, Y. J., Soon, A. & Lee, H. Single-atom catalyst of platinum supported on titanium nitride for selective electrochemical reactions. *Angew. Chem. Int. Ed.* **55**, 2058-2062 (2016).
- 8 Sun, Y. et al. Activity-selectivity trends in the electrochemical production of hydrogen peroxide over single-site metal-nitrogen-carbon catalysts. *J. Am. Chem. Soc.* **141**, 12372-12381 (2019).
- 9 Pizzutilo, E. et al. Gold-palladium bimetallic catalyst stability: consequences for hydrogen peroxide selectivity. *ACS Catal.* **7**, 5699-5705 (2017).
- 10 Sheng, H. et al. Electrocatalytic production of H<sub>2</sub>O<sub>2</sub> by selective oxygen reduction using earth-abundant cobalt pyrite (CoS<sub>2</sub>). *ACS Catal.* **9**, 8433-8442 (2019).
- 11 Jung, E. et al. Atomic-level tuning of Co-N-C catalyst for high-performance electrochemical H<sub>2</sub>O<sub>2</sub> production. *Nat. Mater.* **19**, 436-442 (2020).
- 12 Shen, R. et al. High-concentration single atomic Pt sites on hollow CuS<sub>x</sub> for selective O<sub>2</sub> reduction to H<sub>2</sub>O<sub>2</sub> in acid solution. *Chem* **5**, 2099-2110 (2019).
- 13 Perdew, J. P. Generalized gradient approximation made simple. *Phys. Rev. Lett.* **77**, 3865-3868 (1996).
- 14 Nørskov, J. K. Trends in the exchange current for hydrogen evolution. *J. Electrochem. Soc.* **152**, J23-J26 (2005).
